# Supplementary material
Source: publisher site journal article supplement (https://www.degruyter.com/publication/journal_key/MT/downloadAsset/MT_Instructions%20for%20Authors%20MT.pdf)
Supplement: Supplementary file 1 [file MT_Instructions%20for%20Authors%20MT.pdf]

# Materials Testing

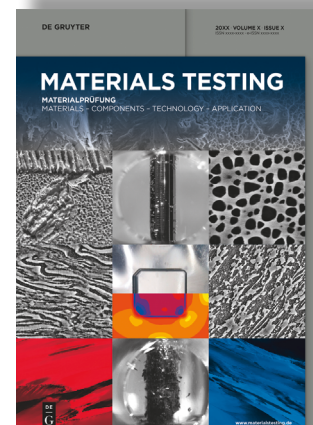

## Table of Contents

|                                                                                |    |
|--------------------------------------------------------------------------------|----|
| <b>Scope and general policies of the journal</b> .....                         | 2  |
| Scope .....                                                                    | 2  |
| Article (manuscript) categories .....                                          | 2  |
| Submissions in the following topics are welcome .....                          | 2  |
| <b>Peer review, turnaround times and preprint policies</b> .....               | 2  |
| Peer review information .....                                                  | 2  |
| Turnaround time .....                                                          | 2  |
| Issue based publication .....                                                  | 2  |
| Rejection of manuscripts .....                                                 | 3  |
| Appeals .....                                                                  | 3  |
| Preprint policy .....                                                          | 3  |
| Inclusive language policy .....                                                | 3  |
| <b>Submission of manuscripts</b> .....                                         | 3  |
| First submission .....                                                         | 3  |
| Revisions .....                                                                | 3  |
| ORCID .....                                                                    | 4  |
| Submission declaration and verification .....                                  | 4  |
| Scientific misconduct .....                                                    | 4  |
| Research integrity .....                                                       | 5  |
| <b>Post-acceptance</b> .....                                                   | 5  |
| Galley proofs .....                                                            | 5  |
| Offprints .....                                                                | 5  |
| Repository policy .....                                                        | 5  |
| Subscription-based and hybrid journals .....                                   | 5  |
| Copyright .....                                                                | 5  |
| Open Access in hybrid journals .....                                           | 6  |
| Article Processing Charges (APCs) .....                                        | 6  |
| <b>Ethical conduct of research</b> .....                                       | 6  |
| Acknowledgments .....                                                          | 6  |
| Authorization for the use of human subjects – Research ethics .....            | 6  |
| Author contributions .....                                                     | 6  |
| Competing interests .....                                                      | 7  |
| Research funding .....                                                         | 7  |
| Data availability .....                                                        | 7  |
| <b>Preparation of manuscript</b> .....                                         | 7  |
| Author information .....                                                       | 7  |
| Language .....                                                                 | 8  |
| General format and manuscript elements .....                                   | 8  |
| Abstract .....                                                                 | 8  |
| Keywords .....                                                                 | 8  |
| Headings .....                                                                 | 8  |
| References .....                                                               | 8  |
| Figures and figure captions .....                                              | 8  |
| Tables and table captions .....                                                | 9  |
| Abbreviations .....                                                            | 9  |
| Equations and symbols .....                                                    | 9  |
| Units .....                                                                    | 10 |
| Scientific names and expressions .....                                         | 10 |
| Numbering of items and samples .....                                           | 10 |
| Audio and Video .....                                                          | 10 |
| Appendices .....                                                               | 10 |
| Supplementary material .....                                                   | 10 |
| Author biography under in the section “The authors of this contribution” ..... | 11 |

## Scope and general policies of the journal

### Scope

*Materials Testing* is a SCI-listed English language journal dealing with all aspects of material and component testing with a special focus on transfer between laboratory research into industrial application. The journal provides first-hand information on non-destructive, destructive, optical, physical and chemical test procedures. It contains exclusive articles which are peer-reviewed applying respectively high international quality criterions.

All articles are subject to thorough, independent peer review. *Materials Testing* publishes monthly issues per volume in print and online. The publication language is English.

### Article (manuscript) categories

- Research Article
- Review Article
- Miscellaneous

### Submissions in the following topics are welcome

|                              |                                                                       |
|------------------------------|-----------------------------------------------------------------------|
| • Mechanical Testing         | • Testing related to Production Techniques                            |
| • Fatigue Testing            | • Component Testing                                                   |
| • Fracture Mechanics Testing | • Fractography                                                        |
| • Corrosion Testing          | • Materialography                                                     |
| • Wear Testing               | • Metallurgy                                                          |
| • Non-destructive Testing    | • Testing of Physical and Chemical Properties                         |
| • Materials Modelling        | • Testing for Welding, Joining or Additive Manufacturing Applications |

## Peer review, turnaround times and preprint policies

### Peer review information

*Materials Testing* is a single-blind journal. Manuscripts are reviewed anonymously by at least one independent reviewer selected by the Editor-in-Chief.

All manuscripts will be prescreened for suitability and quality for publication in the journal. The Editor-in-Chief reserves the right to reject submitted manuscripts without peer review if the studies are not novel or important enough to merit publication in the journal. Manuscripts deemed unsuitable (insufficient originality or limited interest to the target audience) will be also rejected without review. Please refrain from submission of manuscripts that are not prepared by following strictly the Instructions for Authors and the [Template MT Instructions for Authors](#), as such manuscripts are at risk to be rejected during pre-screening.

### Turnaround time

*Materials Testing* aspires to inform authors of the formal pre-screening decision within 3 months after submission. After a successful pre-screening or a revision of the manuscript after the pre-screening, a manuscript will be peer reviewed. The decision of the peer-review will be communicated within 6 weeks after a successful pre-screening result. Revised manuscripts should be returned within 2 days (minor modifications) or 7 days (major modifications). Accepted articles will be published online within 4 weeks of final acceptance.

### Issue based publication

Articles are first published online as DOI citable articles and are later assigned to an issue with final page numbers.

## Rejection of manuscripts

Manuscripts dealing with subjects that have been well studied in the literature, and that do not resolve questions raised by previous studies, or manuscripts that are statistically underpowered, are likely to be rejected without peer review.

Manuscripts are also at risk to be rejected without peer review, if they do not strictly comply with the Instructions for Authors and the [Template MT Instructions for Authors](#).

Manuscripts that have been asked to be revised several times after peer-review are also at risk to be rejected.

## Appeals

Manuscripts that have been rejected for publication will be reconsidered only at the discretion of the Editor-in-Chief. Authors wishing to request reconsideration of a previously rejected manuscript must do so in written form and submit a rebuttal by e-mail to the Editor-in-Chief. Authors should provide detailed reasons why they believe the manuscript should be reconsidered. If the rebuttal is accepted, the author will be asked to re-submit the manuscript, or the decision will be reversed.

## Preprint policy

De Gruyter does not consider the following purposes of a paper as pre-publication: publication in the form of a congress abstract, publication as an academic thesis, publication as an electronic preprint on recognized servers such as arXiv, RePEc, bioRxiv, ResearchSquare, etc.

## Inclusive language policy

Inclusive language recognizes diversity, conveys respect for all people, is sensitive to differences and promotes equal opportunities. Content should not make assumptions about readers' beliefs or commitments; should not contain anything that might suggest that one person is superior to another because of age, gender, race, ethnicity, culture, sexual orientation, disability or health condition; and should use inclusive language throughout. Authors should ensure that their writing is free from prejudice, stereotypes, slang, references to the dominant culture and/or cultural assumptions.

We advise the following approach: Aim for gender neutrality by using plural nouns (clinicians, clients, participants) as standard and avoiding "he" or "she", wherever possible. Instead, please use "they". We recommend avoiding the use of descriptors that refer to personal characteristics such as age, gender, race, ethnicity, culture, sexual orientation, disability or health status unless they are relevant and valid.

## Submission of manuscripts

### First submission

Submit manuscripts exclusively online at

<https://mc.manuscriptcentral.com/dgmt>

We strongly recommend the authors register with institutional e-mail addresses, and refrain from using private e-mail addresses. A cover letter must be submitted for each manuscript upon first submission briefly highlighting the three most important features or results of the contribution and reasons, why the paper should be published in *Materials Testing*. Usage of the box provided during submission in ScholarOne for the cover letter ("Write Cover Letter") is mandatory. Authors should refrain from providing cover letters separately or submitting those by email. The submission of the filled-in [Template for Ethical and Legal Declarations](#) is also required for submission.

### Revisions

After the reviewing process, the corresponding author will receive the reviewed and already edited main document as MS-word file, for correction and revision according to the attached and completed review form. Please, use only these two files while preparing your revision, i.e. to the reviewed and already edited version of the main manuscript and the review form. You will recognize these two documents by the MT number and the corresponding author's surname, like MT-XXXX-2024-Surname-MainDoc-Revx.doc and MT-XXXX-2024-Surname-ReviewFormx.doc, respectively.

Changes by the authors during the revision process can only be made in the already edited MS-word file of the main manuscript. Changes in the text must be clearly marked in highlighted blue color. Any changes by the authors made in the text using any alteration mode of MS-Word will not be accepted.

Changes in tables and figures should only be made in black and white.

Please follow strictly the amendments in the review form.

The amendments are categorized as Major amendments or Minor amendments. Both types should be considered appropriately during revision. Optional amendments are suggestions to improve the paper and authors can choose to follow them.

Fulfilment of the amendments and larger changes must be commented on by the authors in the review form. Please avoid making comments to amendments via email, in the text or as additional files and letters.

Generally, authors will be given a deadline of only max. 7 days for the revision of the paper according to the major amendments. For revision of manuscript with minor amendments, max. 2 days are given. Authors should adhere to these deadlines, in order not to retard the publication process. Extensions may only be granted upon formal request by the corresponding author. If authors do not respond within the given deadline, the paper will immediately be taken out of the publication process until the author has responded. If no response is received after reminder, the authors risk that the paper will be completely dropped.

Changes of figures have also to be made in the separate files and the corrected figures must be uploaded as well. Authors are responsible to check and confirm that the changes in the figures incorporated in the main manuscript are identical to those in the separately uploaded files.

Depending on the decision of the editor and publisher, properly revised manuscripts will be accepted and forwarded to production (typesetting). No further changes (except for typos) are allowed at this point!

The corresponding author can monitor the publication status of the manuscript at any time in ScholarOne and thus, any further requests to the EiC or the Journal Coordinator at De Gruyter will not be answered.

## ORCID

The ORCID (Open Researcher and Contributor ID) is a non-profit, publisher-independent system that is used to uniquely identify academics and their publications. Click [here](#) for detailed information about ORCID. Submitting authors can login with username and password. If the journal uses ScholarOne as submission tool, authors can also login with their ORCID number. Providing an ORCID number for each author is strongly recommended.

## Submission declaration and verification

For information on plagiarism, please refer to [COPE – Committee of Publication Ethics](#). Submission of a manuscript to a journal implies that the work described has not been published previously, except in the form of an abstract, academic thesis, lecture, or preprint; that it is not under consideration for publication elsewhere (multiple, redundant, concurrent publication); that publication of the work is approved by all authors and tacitly or explicitly by the responsible authorities where the work was carried out; and that, if accepted for publication, it will not be published elsewhere, no matter in which language, without the written consent of the Publisher.

Exceptions are listed under Preprint policy.

To exclude potential overlap with prior publication(s), your manuscript may be checked by the plagiarism checker Crossref Similarity Check ([iThenticate](#)). Previously published material must be referenced appropriately in the manuscript, regardless of whether the material was previously published in a subscription based, hybrid or open access journal, or in another language.

## Scientific misconduct

Only articles that have not been or will not be published elsewhere will be published in the journal, excluding articles that fall under De Gruyter's [Repository Policy](#). Multiple submissions/publications or redundant publications (i.e. republication of data already published by the same authors) will be rejected. If identified after publication, the journal reserves the right to publish a retraction note. In any case, editors will follow COPE's Code of Conduct and implement its advice.

## Research integrity

The authors are responsible for all aspects of the study and will ensure that any questions regarding the accuracy and integrity of any part of the work are adequately investigated and resolved.

With submitting your manuscript to *Materials Testing* the authors declare that they are the sole and intellectual authors of the manuscript. We do not accept submissions that name Artificial Intelligence (AI) and/or Machine Learning Tools as credited author(s) on a manuscript because such tools cannot take responsibility for the submitted work and therefore cannot be considered as eligible authors. Where such tools or technologies are used as part of the design or methodology of a research study, their use should be clearly described in the Acknowledgments section. In case of doubt, we reserve the right to ask the authors to submit the raw experimental data.

## Post-acceptance

### Galley proofs

Once the manuscript is accepted for publication, it is being forwarded to typesetting. The corresponding author of an article receives the galley proofs in electronic form to check them for editing and typesetting accuracy. Corresponding authors receive an e-mail notification by [noreply@degruyter.com](mailto:noreply@degruyter.com), subject: "Check your proof pdf: MT-xxxx-xxxx" (please carefully check your e-mail inbox as well as your spam folder) with a link to the online proofreading system (Proof Central) through which they can access their galley proofs. The interface is similar to MS Word: authors can edit the text by entering their corrections directly, adding comments, and answering questions from the copy editor. If preferred, authors can also annotate and upload edits to the PDF version.

Authors should check the proof carefully for possible typos and the correctness of tables and figures. No major changes or additions to the article and/or the author list will be accepted. It is mandatory to respond to the proofreading and permission to print request within three days. Otherwise, you risk a significant delay of publication.

### Offprints

Electronic files of typeset articles in Adobe Acrobat PDF format are provided free of charge. The corresponding author will receive an e-mail notification when the article has been published online along with instructions on how to access the article.

### Repository policy

Policies for sharing published journal articles differ for subscription-based and open access articles.

#### Subscription-based and hybrid journals

Authors may publish their articles in a public repository after an embargo period of 12 months (see De Gruyter's [Sharing Policy](#)). Only the accepted author version of the manuscript, not the PDF version of the published article, can be published:

Immediately

- via their non-commercial personal website, blog or social media channels
- by updating a preprint in arXiv, RePEc, bioRxiv, ResearchSquare, etc. with the version of the accepted manuscript
- as a closed deposit via their research institute or institutional repository for internal institutional purposes or as part of an invitation-only research collaboration workgroup
- directly by providing copies to their students or to research collaborators for their personal use
- for private scholarly sharing as part of an invitation-only work group

After the embargo period

- as open deposits to institutional or subject repositories
- to scholarly collaboration networks (SCNs)

### Copyright

Manuscripts submitted to subscription and hybrid journals are accepted on condition of transfer of copyright ([License to Publish](#)) (for U.S. government employees: to the extent transferable) to the publisher. Once the manuscript has been accepted, it may not be published elsewhere without the consent of the copyright holders.

### Open Access in hybrid journals

In case authors chose to publish their paper open access, they declare consent to place the article under the Creative Commons license CC-BY 4.0. In this case, the exclusive rights previously granted to the publisher will be converted into non-exclusive rights. The author confirms that they have already acquired all necessary rights for all components of the work in the event of an open access publication. For more information, refer to paragraph 5 in the [License to Publish](#).

### Article Processing Charges (APCs)

Authors publishing in *Materials Testing* do **not** have to pay APCs if they do not wish to publish their article open access. After acceptance and before production of an article, authors can decide whether to publish their article open access. Only if they decide to publish open access, APCs will be charged. All articles are peer-reviewed and accepted for publication based on the quality of their scientific contribution. The decision to publish open access does not affect the peer review process or the acceptance of the article. De Gruyter has [institutional agreements](#) in place that allow authors to publish open access articles at no cost at all – or with a significant discount. For more information on De Gruyter's open access policy, please read our [Open Access Policies](#).

### Ethical conduct of research

**Manuscripts must follow certain ethical guidelines** to be considered for publication. These can generally be found in the [Publication Ethics and Malpractice Statement](#). Accordingly, **before submitting your manuscript, please make sure that you and your co-authors agree to the applicable requirements**. For example, this may involve declaring and ruling out conflicts of interest or proving compliance with legal requirements related to human and animal testing.

Furthermore, our [Code of Conduct for Publication Procedures and Ethics](#) defines the responsibility of De Gruyter as a publisher and the Editors we work with, to ensure the legitimacy and quality of our published research. Our principles are based on the guidelines of the [Committee on Publication Ethics \(COPE\)](#).

**Please note: The upload of the filled-in [Template for Ethical and Legal Declarations](#) is mandatory for the submission of your manuscript.** Please read the detailed information on the statements below carefully.

### Acknowledgments

Authors may wish to acknowledge individuals, working groups, institutions, etc. who provided help and support (other than financial) during research and the preparation of the manuscript (e.g., language checking, writing assistance or proof reading of the article, etc.). Individuals acknowledged are not included on the title page, as a footnote to the title or otherwise.

We do not accept submissions that name Artificial Intelligence (AI) and/or Machine Learning Tools as credited author(s) on a manuscript because such tools cannot take responsibility for the submitted work and therefore cannot be considered as eligible authors. Where such tools or technologies are used as part of the design or methodology of a research study, their use should be clearly described in the Acknowledgments section.

### Authorization for the use of human subjects – Research ethics

Manuscripts that contain information on the use of humans should clearly state that the research complies with all relevant national regulations and institutional policies and has been approved by the authors' Institutional Review Board or any equivalent Committee. The Editor-in-Chief reserves the right to seek additional information or guidance from reviewers on any cases in which concerns arise. All investigations with human subjects must be conducted by following the tenets of the [Declaration of Helsinki](#), what is more authors must identify the Committee or Institutional Review Board approving the experiments, and provide a statement indicating approval of the research. If applicable, information on research ethics and/or approval by the Institutional Review Board should be given in the Methods section.

### Author contributions

In view of research integrity, authorship is generally confined to an individual who has made a substantial intellectual or practical contribution to the conception or design of the project or the acquisition, analysis, or interpretation of data for the work of a publication and/or has drafted the work or reviewed/revised it critically for



important intellectual content. The individual(s) listed as author(s) must agree to be accountable for said contribution and approve of the final version. **Honorary authorship is not allowed.**

Individuals who helped or participated in certain substantive aspects of the project or work (e.g., technical services staff), but whose contributions were not of sufficient extent to be listed as co-authors, should be appropriately acknowledged, usually in an Acknowledgements section.

### Competing interests

A conflict of interest for a particular manuscript exists when a participant in the peer review and publication process – author, reviewer, and Editor – has ties to activities that could inappropriately influence his or her judgment, regardless of whether the judgment is actually affected. Financial relationships with industry (for example, employment, consultancies, stock ownership, honoraria, patent applications, expert testimony, grants and other funding), either directly or through immediate family, are usually considered the most important conflicts of interest. However, conflicts can occur for other reasons, such as financial support of the study, ties to health insurance, politics or other stakeholders, personal relationships, academic competition, and intellectual passion. To ensure fair and objective decision-making, authors must declare any associations that pose a conflict of interest (financial, personal or professional) in connection with the manuscript under evaluation. This must be declared during the submission process and also at the end of the manuscript. If you do not have a statement to make, please insert: *The authors state no conflict of interest.*

### Research funding

Funding sources should be indicated in the [Template for Ethical and Legal Declarations](#). When the study benefitted from funding through an unrestricted grant or other resources provided to a university, college, other research institution, or an individual author, state the name of the institute or organization that provided the funding along with the grant number, if applicable.

If no funding was provided for the research, the default statement will be set in place: *None declared.*

### Data availability

*Materials Testing* requires authors to follow our [Data Sharing Policy](#), which must comply with the European GDPR (*General Data Protection Regulation*) rules. Research data should be made widely available to the research community to demonstrate the robustness and validity of the research presented in the journal, to enable and encourage replication of the results, and to allow the community with opportunities to learn.

By publishing in the journal, authors are required to provide a data availability statement (DAS) in their articles. The DAS confirms the presence or absence of shared data. The DAS should include information on where the data supporting the findings reported in the article can be found, including, if applicable, hyperlinks to publicly archived datasets analyzed or generated during the study. If research data are not publicly available, this must be stated in the manuscript, as well as the conditions for accessing the data.

Authors are encouraged to share their data but are not required to do so. The decision to publish will not be affected by whether or not authors share their research data.

## Preparation of manuscript

For detailed requirements regarding layout and structure of your manuscript, please carefully follow and use the [Template MT Instructions for Authors](#). Please note that manuscripts not abiding to the requirements outlined there will be rejected. Please, also consider appropriately the script type (Arial) and sizes as shown in the [Template MT Instructions for Authors](#). In particular, refrain from submitting copy-pasted manuscripts that have previously been prepared and submitted to other journals under their specific authors' instructions.

### Author information

- Author names

Write at least one given and family name in full. For all other names, initial is sufficient. List authors in the order you want them to appear in the final version. Indicate the corresponding author by using an asterisk “\*” after the family name. Please note that as per De Gruyter policy, no author list changes are permitted after acceptance of a manuscript.

Author footnotes (superscript letters or numbers) to explain authorship details are not all allowed in the author line and will be converted to an author note on the first page. Kindly stick to the wording as in the examples below:

- [Full name author A] and [full name author B] contributed equally to this work.
  - [Full name author A] and [full name author B] contributed equally to this work and share first authorship.
  - [Full name author A] and [full name author B] share senior authorship.
  - [Full name author A] and [full name author B] share first authorship.
- Affiliations

For the corresponding author supply the following details: e-mail address, department, institution, street, city, postal code and country; for all other authors department, institution, city, postal code and country are mandatory. Please also provide all details concerning the current institutional affiliation in case you changed affiliation during the manuscript preparation and publication process.

Supplying an ORCID is highly recommended (for more information and registration, please visit the ORCID webpage: <https://info.orcid.org/benefits-for-researchers/>).

## Language

All manuscripts must be written in clear and concise English. This also comprises tables, figures as well as the respective captions. Please use preferably American English. If you have reasons to doubt your proficiency with respect to spelling, grammar, etc. (e.g., because English is not your native language), then you may wish to employ – at your expense – the services of a professional language editor. Please refrain from any submission of poorly written papers, since these will be rejected immediately.

## General format and manuscript elements

### Abstract

Give a concise summary of your article in an abstract of approx. 200 words in a single paragraph. As abstracts are published separately by abstracting and indexing services, please spell out abbreviations at first use and do not include footnotes, tables, figures or equations. Avoid using references. If it is essential to use a reference in the abstract, please expand it as per journal reference style.

### Keywords

Keywords are used by abstracting and indexing services as well as search engines to facilitate finding your paper. Together with the abstract of your paper, they are a key tool enabling readers to find your paper and for increasing citations.

Supply 5–6 specific keywords in lower case, separated by semicola.

These can be single words, but also short phrases representing the content. Make sure to select precise and concise keywords to your field or sub-field of research. Avoid abbreviations and the repetition of words already used in the article's title.

### Headings

Your manuscript should be subdivided into sections (and, if necessary, subsections). These sections should be labeled with headings in a consistent format and with a clear hierarchy of section headings. Limit your subsections to a maximum of one (!) level. Headings do not have a full stop. Headings and sub-headings should be numbered and in sentence case.

### References

*Materials Testing* follows IEEE reference style. Please adhere strictly to it as outlined in the [IEEE Reference Quick Guide](#) (a [full guide](#) is also available). The style sheet provides examples for different types of citations in the text as well as for different bibliographic items in the reference list. Please note: All references mentioned in the reference list must be mentioned in the text, and vice versa.

### Figures and figure captions

Graphs, line drawings, photographs, schemes, diagrams, etc. may be used to illustrate your findings. Publication of color figures is provided free of charge in both online and print editions. The publication quality always depends directly on the quality and size of the delivered data.



Please label the illustrations as “Figure”. Include figures in the main document but note that each figure should be uploaded separately as .jpg, .eps, .png or .tiff file. Images should have a minimum resolution of 300 dpi (color or black-white pixel graphics/half-tone images) in the intended size (600dpi combination of pixel graphic and line drawing, 1200dpi for line drawings). When drawing bar graphs, use patterning/color instead of grey scales (faint shading may be lost upon reproduction). Figures should not display any frames. Please make sure that diagrams are combined wherever possible.

Authors are responsible that the uploaded figures in the system correspond exactly to the figures included in the text.

Figures should be numbered consecutively using Arabic numerals (from 1) throughout the text and capitalize the first letter of the word, like Figure 1, Figure 2. Please refrain from any abbreviation of figure or sub-figure numbers in the text and refer to figures by the full number, like “as shown in Figure 1”. If you include multi-part figures, please make sure to label all part figures by using lowercase letters with a closing parenthesis, i.e. a), b), c) etc. Please make sure that all figures are explicitly referred to in the text. Do not end the text immediately preceding the suggested positioning of a figure with a colon and avoid expressions such as “in Figure 1 below/above”, as the exact positioning of these elements cannot be determined until after the manuscript has been typeset. Note that figures will usually be placed on the top or the bottom of the page in the final layout.

Provide a concise and self-explanatory caption for each figure. In case of multi-part figures, please include a main caption as well as part figure captions. The main caption should be separated from the part figure captions by a comma, e.g., Figure 1: This is the main caption, a) this is part figure caption a, b) this is part figure caption b.

In the text figures should be cited as “Figure 1a”, “Figures 2a–d”, “in Figures 3–6”, or “in Figures 1a and 3a” (do not use abbreviations such as Fig., do not use parentheses for part figures in in-text citations).

The key to the symbols depicted in the figures should be included in the figure itself, where possible. Otherwise, include it in the caption. The caption itself should not be included in the figure.

Please make sure that letters, numbers, symbols, text, etc. included in the figure are clear, easy to read (not below 6pt, preferably in Arial) and uniform in style. The first word of any textual information in figures should start with a capital letter, i.e. capitalize only the first letter of only the first word, like “Input layer”, “Composite part”.

On the axes of diagrams as well as in any other instances in figures, tables or in the running text, please use decimal points instead of commas to space decimals.

It is the authors’ responsibility to use images that do not infringe on any copyrights, performing rights, trademark rights, personal rights or any other third-party rights or are otherwise unlawful. Copyright permissions can be obtained through the Copyright Clearance Center (<https://www.copyright.com/>). Authors are obliged to cite figures correctly, if they are taken from other sources.

### Tables and table captions

Number tables consecutively using Arabic numerals. Tables should be included in the text in Word format. Please avoid handing in tables as image or Excel files.

Provide a short descriptive title, column heads, and (if necessary) footnotes to make each table self-explanatory. In column heads, separate units with parentheses (e.g., Rotational speed (rpm)). The first word of any textual information in tables should start with a capital letter, i.e. “Rotational speed (rpm)”, “Mean stress  $\sigma$  (MPa)”, i.e. capitalize ONLY the first letter of ONLY the first word, like it has been described above for the figures. To mark decimals please use decimal points instead of commas, i.e. 21.6 N; 12.8 cm. Use footnotes in alphabetical order (a, b, c, etc.) to give emphasis or further information. Expand abbreviations used in tables in footnotes.

Avoid color, shading, vertical lines, and other cell borders. Note that most horizontal lines within the table body will be removed during the production process.

Include tables in the main document, but please note that tables will usually be placed on the top or the bottom of the page in the final layout. Therefore, do not end the text immediately preceding the suggested positioning of a table with a colon and avoid expressions such as “in Table 1 below/above”, as the exact positioning of these elements cannot be determined until after the manuscript has been typeset.

### Abbreviations

The use of abbreviations and acronyms is permitted given that they are expanded in full when used the first time with the abbreviation in parentheses (applies to abstract and main text). Please use them consistently thereafter. Avoid using non-standard abbreviations unless they appear more than three times in the text.

### Equations and symbols

Use the Word Equation Editor of Math Type to type or create equations, formulas or mathematical expressions. Do not submit math equations as images, but as editable text. Displayed equations and formulae should start on separate lines. Number displayed equations consecutively with Arabic numerals (if referred to in the text) in

parentheses flush right (1)...(n). In the text equations should be cited as “Equation (1)” or “Equations (3) to (5)”, for example (note the capital letter and the number in brackets). Do not use abbreviations of equation names. Vectors and matrices must be indicated as such. Extended roots should be written in parentheses with fraction exponents, and exponential functions should exclusively have the format  $\exp(\dots)$ . SI units should be used throughout and will only be accepted. Use  $\text{mW}\cdot\text{cm}^{-3}$  or  $\text{mW cm}^{-3}$  instead of  $\text{mW}/\text{cm}^3$ , for instance. Following an equation provide the parameters used in the respective equation on a separate line. Give the units in brackets to describe a parameter underneath an equation. Do not use brackets for the value of a parameter or a unit throughout the main text, for instance write: “The material exhibits a yield strength of  $\sigma_y = 1100 \text{ MPa}$ ”. Note the spacing between the parameter, the symbol, the value and the unit.

A complete equation or formula then looks like:

$$\text{Equation} = \text{XXXXX}\cdot\text{YY}^{-1} (\text{unit}) \quad (1)$$

with  $\sigma$ : Stress (MPa), l: Length (mm), Abb: Parameter (unit) etc.

### Units

SI units should be used throughout and will only be accepted. Use  $\text{mW}\cdot\text{cm}^{-3}$  or  $\text{mW cm}^{-3}$  instead of  $\text{mW}/\text{cm}^3$ , for instance. For more information, please visit <https://www.bipm.org/en/home>

Please use wt.%, vol.% and at.%. A narrow non-break space U+202F should be presented between numbers and units (except °). The units °C and % should be spaced (narrow non-break space U+202F).

### Scientific names and expressions

Use scientific names according to ISO standards and according to the nomenclature of the respective scientific communities related to the field of materials science and engineering, welding and production technology etc.

### Numbering of items and samples

Use a consecutive numbering of items and specimens, like Specimen 1, Sample S2, etc. Capitalize the first letter; if you talk about specific items, like “Specimen 3 was subjected to a different heat treatment”. If you talk about items in general, do not capitalize the first letter, like “...all samples were subjected to testing...”.

### Audio and Video

For all examples connected to an audio/video recording, supply audio/video clips. Deliver these clips as separate files and do not integrate them directly into the manuscript.

Name all your clips using the following convention:

e.g., audio-1-smith.MP3, video-1-smith.MP4,

[media]-[identifier]-[author-family-name].[extension]

Indicate the position in the article by placing a marker as follows:

[associated audio-1-smith.wav with example (1)]

Provide a short caption for each media file and number them consecutively. Any other media files can be included as part of the supplementary material.

File naming: audiosupplement-1-smith.MP3,

[media.supplement]-[identifier]-[author-family-name].[extension]

The following formats are preferred: audio files in MP3 (at least 16 bit) and video files in MP4 (at least a height of 480 pixels and a frame rate of 25). However, other common formats are also permitted.

### Appendices

Appendices should be avoided, except for long formulas or codes. The appendix is placed at the end of the main text before the reference list.

### Supplementary material

Supplementary material which may offer further information on your work but does not belong to the core part of the article, will not be part of the typeset article PDF. The material will be made available as a separate download in the online version of the article. Supplementary material may contain questionnaires for discussed surveys, protocols, code samples, datasets, extensive tables, additional figures, multimedia files (audio, video, animations), etc. If the manuscript is accepted, supplementary material will be referenced in the print version, but will be published online only.

Please provide supplementary material data as separate file(s) of no more than 10 MB per file during submission. Note that the material should be publication-ready (not in track-changes mode), as it will not be typeset, but published exactly as supplied. Within the text, the supplementary material must be cited consecutively and be

referred to as supplementary material data (e.g., see Supplementary Material, Fig. 1, or Figure S1, Table S1, etc.).

**Author biography under in the section “The authors of this contribution”**

Provide a brief biography (max. 80 words) including, e.g., your qualifications, awards won, membership of professional societies, and highlighting your expertise/research interests related to the article’s topic. These should be placed in the main document after the references in the section “The authors of this contribution”. For articles with more than five authors, bionotes are restricted to five.
